# Supplementary material for: CD16 pre-ligation by defucosylated tumor-targeting mAb sensitizes human NK cells to γc cytokine stimulation via PI3K/mTOR axis
Source: Springer Nature journal article supplement (doi:10.1007/s00262-020-02482-2), 2020-01-16
Supplement: MOESM1 [file 17685744]

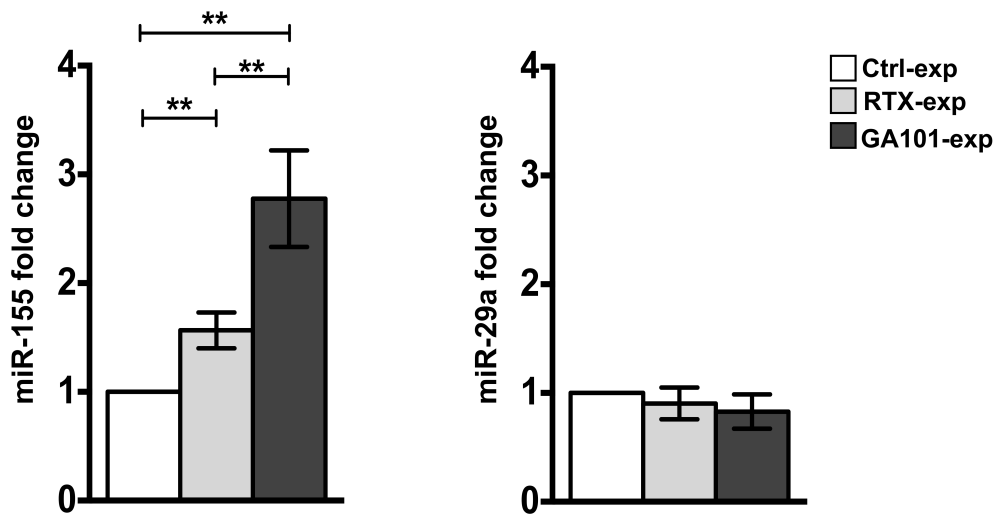

**supplementary Figure 1.** miR-155 upregulation in anti-CD20-experienced NK cells.

Primary cultured NK cells were stimulated (2:1) for 18 h with biotinylated rituximab (RTX-exp)-, obinutuzumab (GA101-exp)-opsonized or not opsonized Raji (Ctrl-exp) and immunomagnetically purified by negative selection. Relative miR-155 or miR-29a levels were measured by RT-qPCR. Bar graphs depict the fold change expression relative to the Ctrl-exp population (set to 1) after normalizing with the RNU-48 endogenous control. Data (mean  $\pm$  SEM) from n=9 donors from three independent experiments are shown. **\*\* $p=0.0039$**

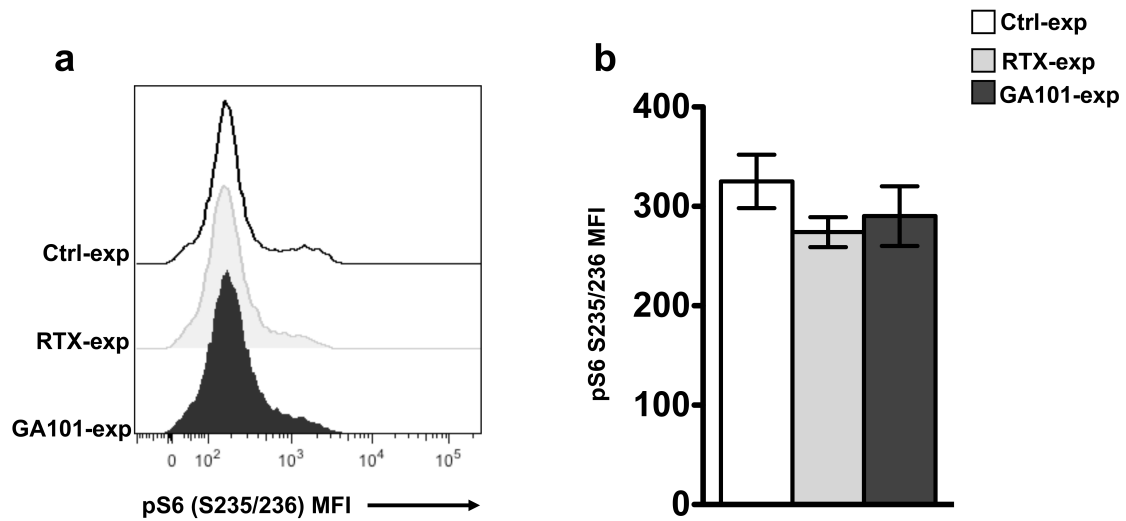

**supplementary Figure 2** Basal S6 phosphorylation levels in experienced NK cells.

Primary cultured NK cells were stimulated (2:1) for 18 h with biotinylated rituximab (RTX-exp)-, obinutuzumab (GA101-exp)-opsonized or not opsonized Raji (Ctrl-exp) and immunomagnetically purified by negative selection. S6 phosphorylation levels in S235/236 residues were evaluated by FACS analysis in fixed and permeabilized samples. **a** Histogram overlay from one representative experiment is shown. **b** MFI values (mean  $\pm$  SEM) from n=8 donors from three independent experiments

**a**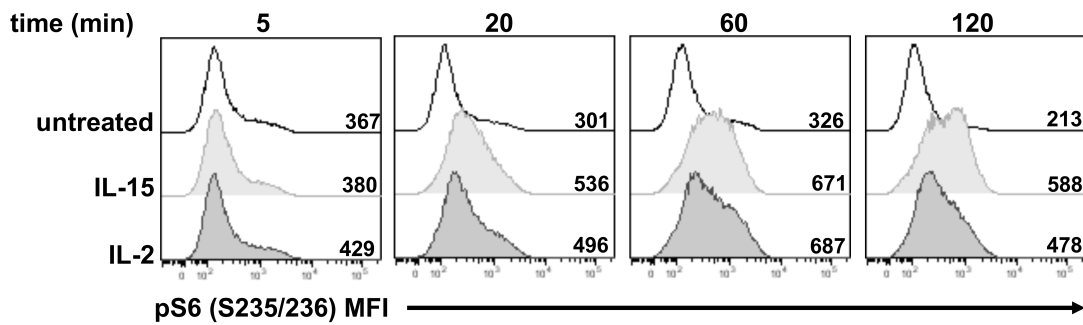**b**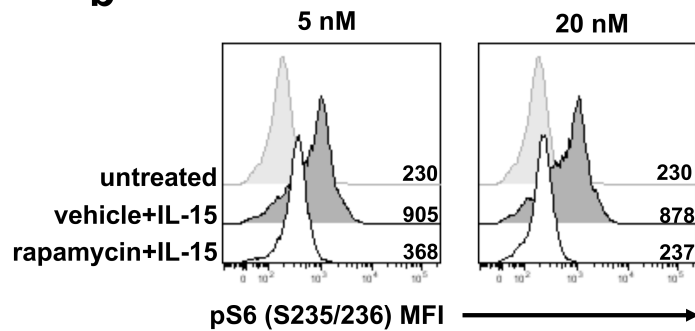

**supplementary Figure 3** Kinetics of  $\gamma_c$  cytokine-induced S6 phosphorylation and sensitivity to mTOR inhibitor rapamycin.

Primary cultured NK cells were stimulated (2:1) for 18 h with biotinylated not opsonized Raji and immunomagnetically purified by negative selection. **a** Cells were left unstimulated or activated with IL-2 (500 U/ml) or IL-15 (100 ng/ml) for the indicated times. **b** NK cells were left untreated (light grey) or pretreated with the indicated doses of rapamycin (white) or with the same volume of DMSO as vehicle (dark grey) for 2 h, and then stimulated for additional 60 min with IL-15 (100 ng/ml) in the presence of the inhibitor. **a** and **b** The phosphorylation levels of ribosomal protein S6 in S235/236 residues were evaluated by FACS analysis in fixed and permeabilized samples. Histogram overlays from one representative experiment, out of three performed, are shown. Numbers represent the MFI values.

**supplementary Table 1. CLL patient characteristics**

| <b>Patient</b> | <b>Age</b> | <b>Sex</b>    | <b>%CD5/CD19</b> | <b>%CD56/CD16</b> | <b>RAI stage</b> |
|----------------|------------|---------------|------------------|-------------------|------------------|
| <b>1</b>       | <b>68</b>  | <b>male</b>   | <b>73.0</b>      | <b>9.5</b>        | <b>0</b>         |
| <b>2</b>       | <b>68</b>  | <b>male</b>   | <b>96.8</b>      | <b>1.33</b>       | <b>2</b>         |
| <b>3</b>       | <b>52</b>  | <b>female</b> | <b>86.2</b>      | <b>4.47</b>       | <b>0</b>         |
